# Supplementary material for: Evaluation of Pharmacokinetics and Pharmacodynamics of Deferasirox in Pediatric Patients
Source: MDPI journal article supplement (doi:10.3390/pharmaceutics13081238), 2021-08-11
Supplement: s1 [file s1]

# Supplementary Materials: Evaluation of Pharmacokinetics and Pharmacodynamics of Deferasirox in Pediatric Patients

Laura Galeotti, Francesco Ceccherini, Carmen Fucile, Valeria Marini, Antonello Di Paolo, Natalia Maximova and Francesca Mattioli

**Table S1.** Predicted and measured  $C_{trough}$  for in the present patient population and statistical analysis showing significant differences among groups with and without hepatic/renal adverse events

| Group                                      | A         | B         | C        | D      | Pooled Total |
|--------------------------------------------|-----------|-----------|----------|--------|--------------|
| observations (N)                           | 18        | 18        | 36       | 36     | 108          |
| sum ( $\sum x_i$ )                         | 626.51    | 539.89    | 149.94   | 135.31 | 1,451.65     |
| mean ( $\bar{x}$ )                         | 34.81     | 29.99     | 4.17     | 3.76   | 13.44        |
| sum of squares ( $\sum x_i^2$ )            | 32,252.15 | 24,563.57 | 1,293.46 | 907.17 | 59,016.35    |
| sample variance ( $S^2$ )                  | 614.46    | 492.36    | 19.11    | 11.39  | 369.20       |
| sample standard deviation (S)              | 24.79     | 22.19     | 4.37     | 3.38   | 19.22        |
| standard deviation of mean (SE $\bar{x}$ ) | 5.84      | 5.23      | 0.73     | 0.56   | 1.85         |

**Table S2.** Final statistical analysis of predicted and measured  $C_{trough}$  in the present patient population in relation to hepatic/renal adverse events

| Source | sum of squares SS | degrees of freedom (vv) | mean square (MS) | F statistic | <i>p</i> -value |
|--------|-------------------|-------------------------|------------------|-------------|-----------------|
| Group  | 19,620.99         | 3                       | 6,540.33         | 34.21       | 1.78e-15        |
| Error  | 19,883.54         | 104                     | 191.19           |             |                 |
| Total  | 39,504.53         | 107                     |                  |             |                 |

**Table S3.** Results of comparisons between groups in relation to hepatic/renal adverse events. The analyses have been performed by Bonferroni and Holm tests. Results are expressed as follows: <sup>a</sup>, Bonferroni and Holm T-statistic; <sup>b</sup>, Bonferroni p-value; <sup>c</sup>, Holm p-value; <sup>d</sup>, Bonferroni and Holm interference

| Groups | B                                                                                          | C                                     | D                                      |
|--------|--------------------------------------------------------------------------------------------|---------------------------------------|----------------------------------------|
| A      | 1.04 <sup>a</sup> / 1.79 <sup>b</sup><br>0.60 <sup>c</sup><br>Not significant <sup>d</sup> | 7.68 / 5.57e-11<br>4.65e-11<br>p<0.01 | 7.78 / 3.36e-11<br>3.36e-11<br>p<0.01  |
| B      |                                                                                            | 6.47 / 1.95e-08<br>9.77e-09<br>p<0.01 | 6.58 / 1.21e-08<br>8.05e-09<br>p<0.01  |
| C      |                                                                                            |                                       | 0.13 / 5.41<br>0.90<br>Not significant |

**Table S4.** Post-hoc Tukey test in relation to hepatic/renal adverse events.

|             | Tukey HSD   |         |                 |
|-------------|-------------|---------|-----------------|
| Groups pair | Q statistic | p-value | Inference       |
| A vs B      | 1.48        | 0.70    | Not significant |
| A vs C      | 10.86       | 0.001   | ** p<0.01       |
| A vs D      | 11.00       | 0.001   | ** p<0.01       |
| B vs C      | 9.15        | 0.001   | ** p<0.01       |
| B vs D      | 9.30        | 0.001   | ** p<0.01       |
| C vs D      | 0.18        | 0.90    | Not significant |

Note: \*\*, statistically significant results

**Table S5.** Post-hoc Scheffé test in relation to hepatic/renal adverse events.

|             | Scheffé     |          |                 |
|-------------|-------------|----------|-----------------|
| Groups pair | T-statistic | p-value  | Inference       |
| A vs B      | 1.04        | 0.78     | Not significant |
| A vs C      | 7.68        | 3.63e-10 | ** p<0.01       |
| A vs D      | 7.78        | 2.23e-10 | ** p<0.01       |
| B vs C      | 6.47        | 1.03e-07 | ** p<0.01       |
| B vs D      | 6.57        | 6.48e-08 | ** p<0.01       |
| C vs D      | 0.13        | 1.00     | Not significant |

Note: \*\*, statistically significant results

**Table S6.** Post-hoc Bonferroni and Holm tests in relation to hepatic/renal adverse events.

|             | Bonferroni<br>and Holm | Bonferroni      |                 | Holm            |                 |
|-------------|------------------------|-----------------|-----------------|-----------------|-----------------|
| Groups pair | T-statistic            | <i>p</i> -value | Inference       | <i>p</i> -value | Inference       |
| A vs B      | 1.04                   | 1.79            | insignificant   | 0.6294870       | insignificant   |
| A vs C      | 7.68                   | 5.57e-11        | ** p<0.01       | 4.65e-11        | ** p<0.01       |
| A vs D      | 7.78                   | 3.36e-11        | ** p<0.01       | 3.36e-11        | ** p<0.01       |
| B vs C      | 6.47                   | 1.95e-08        | ** p<0.01       | 9.77e-09        | ** p<0.01       |
| B vs D      | 6.57                   | 1.21e-08        | ** p<0.01       | 8.05e-09        | ** p<0.01       |
| C vs D      | 0.13                   | 5.41            | Not significant | 0.90            | Not significant |

Note: \*\*, statistically significant results

**Table S7.** Predicted and measured  $C_{trough}$  in the present patient population and statistical analysis showing significant differences among groups with and without hematological adverse events

| Group                                      | A         | B         | C        | D        | Pooled Total |
|--------------------------------------------|-----------|-----------|----------|----------|--------------|
| observations (N)                           | 16        | 16        | 38       | 38       | 108          |
| sum ( $\Sigma x_i$ )                       | 559.36    | 487.13    | 217.10   | 188.07   | 1,451.66     |
| mean ( $\bar{x}$ )                         | 34.96     | 30.45     | 5.71     | 4.95     | 13.44        |
| sum of squares ( $\Sigma x_i^2$ )          | 30,873.09 | 23,517.33 | 2,672.67 | 1,953.39 | 59,016.48    |
| sample variance ( $S^2$ )                  | 754.52    | 579.09    | 38.71    | 27.64    | 369.20       |
| sample standard deviation (S)              | 27.47     | 24.06     | 6.22     | 5.26     | 19.22        |
| standard deviation of mean (SE $\bar{x}$ ) | 6.87      | 6.02      | 1.01     | 0.85     | 1.85         |

**Table S8.** Final statistical analysis of predicted and measured  $C_{trough}$  in the present patient population in relation to hematological adverse events

| Source | sum of squares SS | degrees of freedom (vv) | mean square (MS) | F statistic | <i>p</i> -value |
|--------|-------------------|-------------------------|------------------|-------------|-----------------|
| Group  | 17,045.14         | 3                       | 5,681.72         | 26.31       | 9.62e-13        |
| Error  | 22,459.16         | 104                     | 215.95           |             |                 |
| Total  | 39,504.29         | 107                     |                  |             |                 |

**Table S9.** Results of comparisons between groups in relation to hematological adverse events

. The analyses have been performed by Bonferroni and Holm tests. Results are expressed as follows: <sup>a</sup>, Bonferroni and Holm T-statistic; <sup>b</sup>, Bonferroni p-value; <sup>c</sup>, Holm p-value; <sup>d</sup>, Bonferroni and Holm interference

| Groups | B                                                                                          | C                                     | D                                     |
|--------|--------------------------------------------------------------------------------------------|---------------------------------------|---------------------------------------|
| A      | 0.87 <sup>a</sup> / 2.32 <sup>b</sup><br>0.77 <sup>c</sup><br>Not significant <sup>d</sup> | 6.68 / 7.31e-09<br>6.09e-09<br>p<0.01 | 6.85 / 3.17e-09<br>3.17e-09<br>p<0.01 |
| B      |                                                                                            | 5.65 / 8.56e-07<br>4.28e-07<br>p<0.01 | 5.82 / 3.92e-07<br>2.61e-07<br>p<0.01 |
| C      |                                                                                            |                                       | 0.23/ 4.93<br>0.82<br>Not significant |

**Table S10.** Post-hoc Tukey test in relation to hematological adverse events.

|             | Tukey HSD   |         |                 |
|-------------|-------------|---------|-----------------|
| Groups pair | Q statistic | p-value | Inference       |
| A vs B      | 1.23        | 0.80    | Not significant |
| A vs C      | 9.44        | 0.001   | ** p<0.01       |
| A vs D      | 9.69        | 0.001   | ** p<0.01       |
| B vs C      | 7.99        | 0.001   | ** p<0.01       |
| B vs D      | 8.23        | 0.001   | ** p<0.01       |
| C vs D      | 0.32        | 0.90    | Not significant |

Note: \*\*, statistically significant results



**Table S11.** Post-hoc Scheffé test in relation to hematological adverse events.

|             | Scheffé     |          |                 |
|-------------|-------------|----------|-----------------|
| Groups pair | T-statistic | p-value  | Inference       |
| A vs B      | 0.87        | 0.86     | Not significant |
| A vs C      | 6.68        | 4.01e-08 | ** p<0.01       |
| A vs D      | 6.85        | 1.80e-08 | ** p<0.01       |
| B vs C      | 5.65        | 3.73e-06 | ** p<0.01       |
| B vs D      | 5.82        | 1.78e-06 | ** p<0.01       |
| C vs D      | 0.23        | 1.00     | Not significant |

Note: \*\*, statistically significant results

**Table S12.** Post-hoc Bonferroni and Holm tests in relation to hematological adverse events.

|             | Bonferroni<br>and Holm | Bonferroni      |                 | Holm            |                 |
|-------------|------------------------|-----------------|-----------------|-----------------|-----------------|
| Groups pair | T-statistic            | <i>p</i> -value | Inference       | <i>p</i> -value | Inference       |
| A vs B      | 0.87                   | 2.32            | insignificant   | 0.77            | insignificant   |
| A vs C      | 6.68                   | 7.31e-09        | ** $p < 0.01$   | 6.09e-09        | ** $p < 0.01$   |
| A vs D      | 6.83                   | 3.17e-09        | ** $p < 0.01$   | 3.17e-09        | ** $p < 0.01$   |
| B vs C      | 5.65                   | 8.56e-07        | ** $p < 0.01$   | 4.28e-07        | ** $p < 0.01$   |
| B vs D      | 5.82                   | 3.92e-07        | ** $p < 0.01$   | 2.61e-07        | ** $p < 0.01$   |
| C vs D      | 0.23                   | 5.41            | Not significant | 0.82            | Not significant |

Note: \*\*, statistically significant results

Figure S1

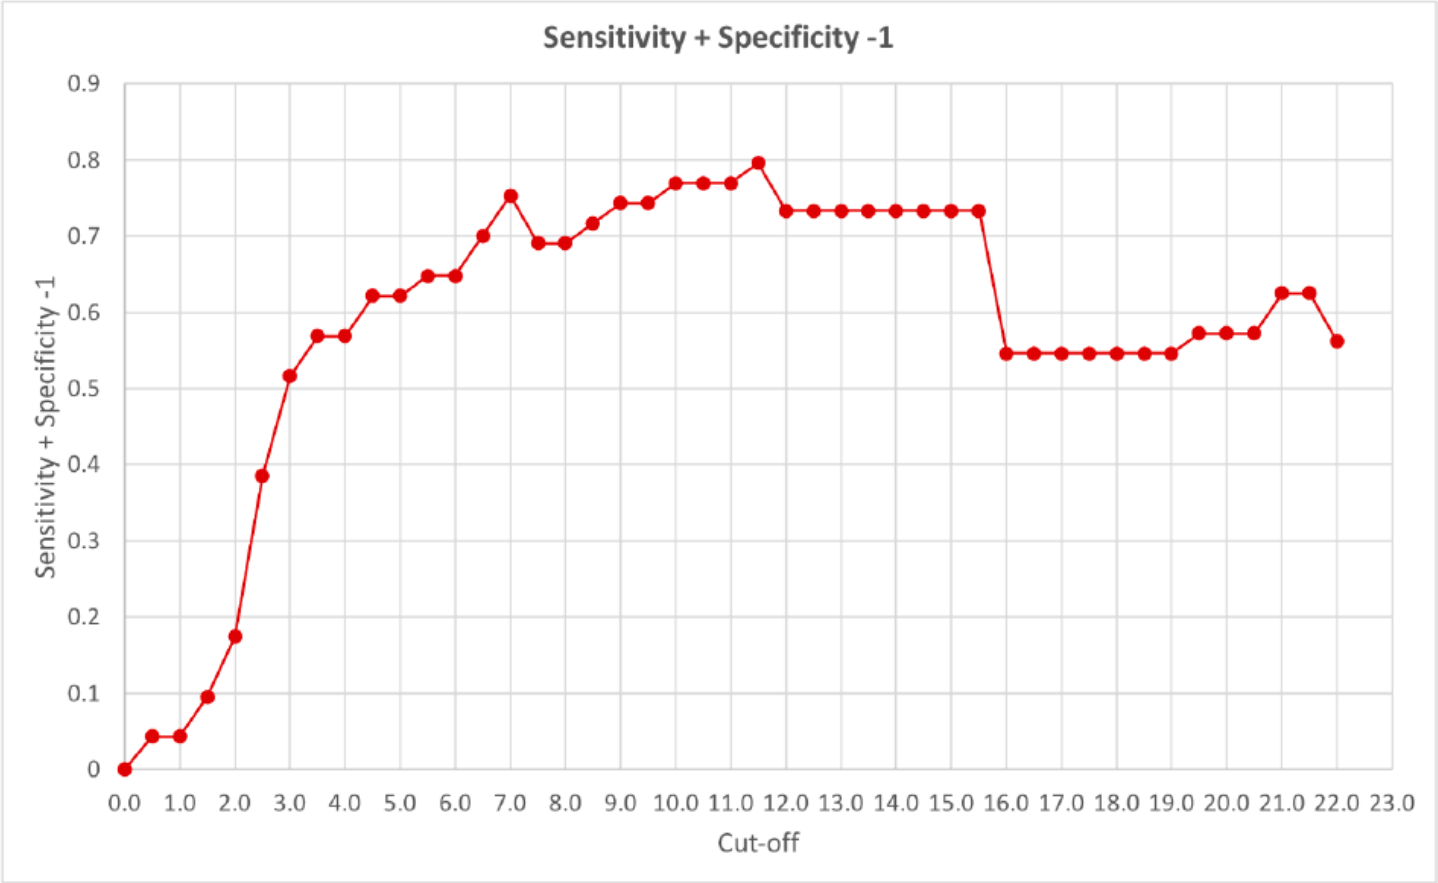

Figure S1. Graph plotting the Youden test results of Ctrough threshold for hematological toxicities.

Figure S2

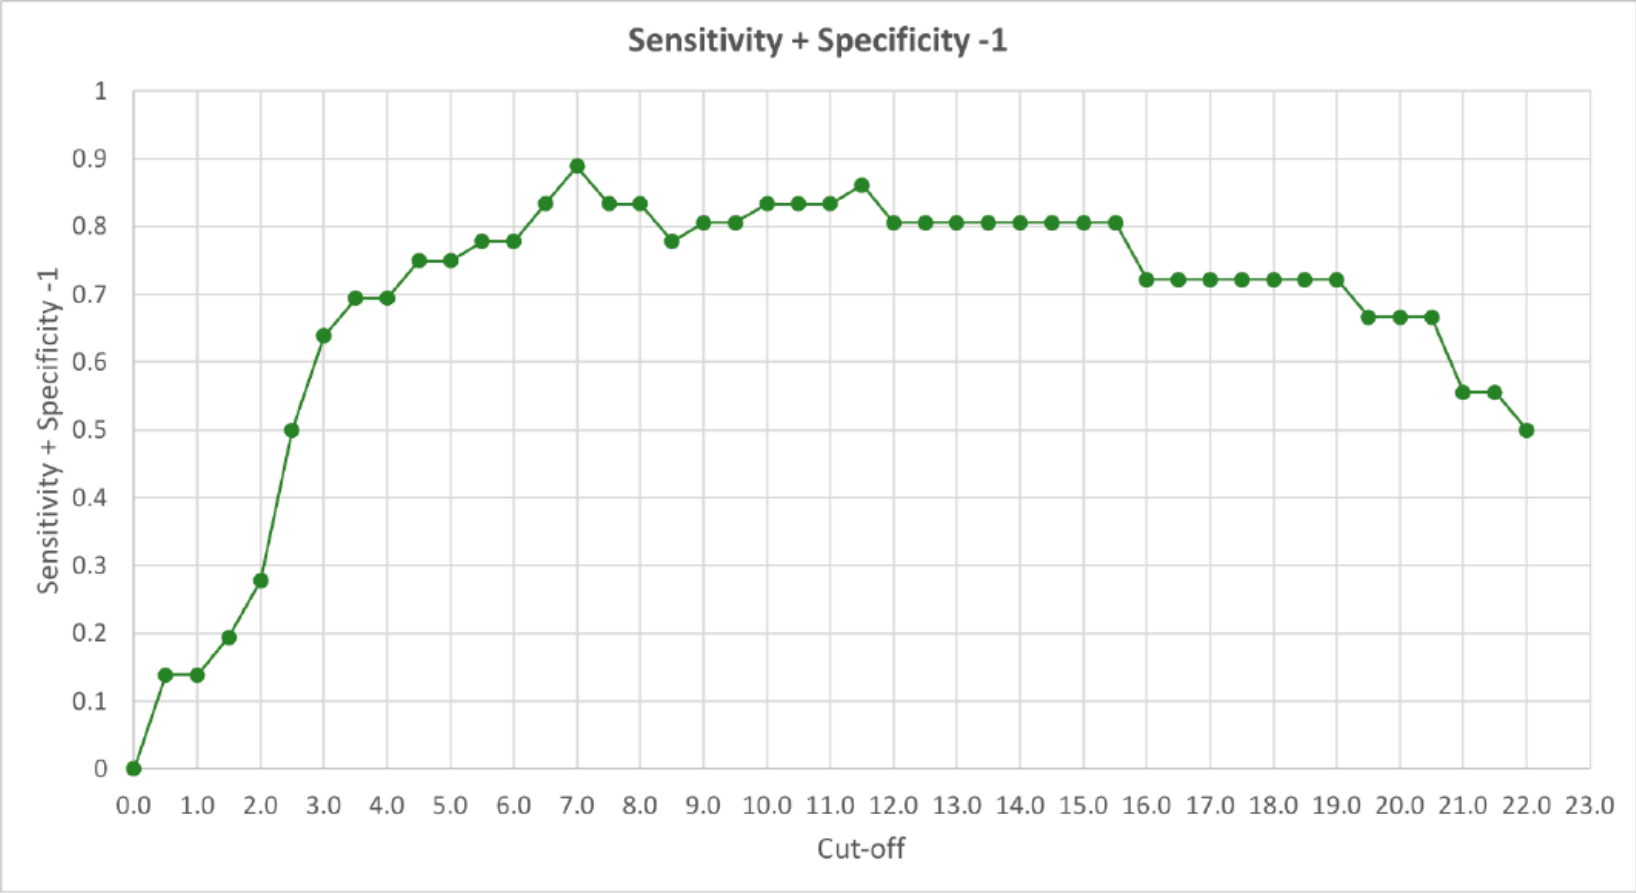

Figure S2. Graph plotting the Youden test results of  $C_{\text{trough}}$  threshold for hepatic/renal toxicities.
